# Supplementary material
Source: PubMed Central journal article supplement (PMC9174147)
Supplement: mmc1.pdf [file mmc1.pdf]

## Supplemental information

### Cryo-EM structures of SARS-CoV-2

#### Omicron BA.2 spike

**Victoria Stalls, Jared Lindenberger, Sophie M.-C. Gobeil, Rory Henderson, Rob Parks, Maggie Barr, Margaret Deyton, Mitchell Martin, Katarzyna Janowska, Xiao Huang, Aaron May, Micah Speakman, Esther Beaudoin, Bryan Kraft, Xiaozhi Lu, Robert J. Edwards, Amanda Eaton, David C. Montefiori, Wilton B. Williams, Kevin O. Saunders, Kevin Wiehe, Barton F. Haynes, and Priyamvada Acharya**

**A**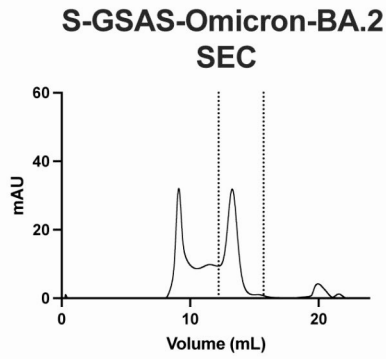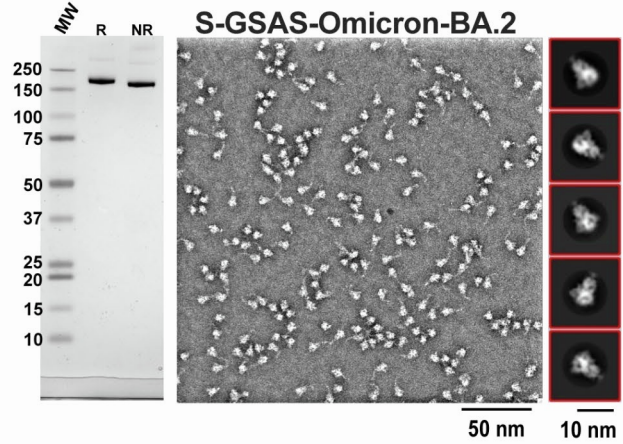**B**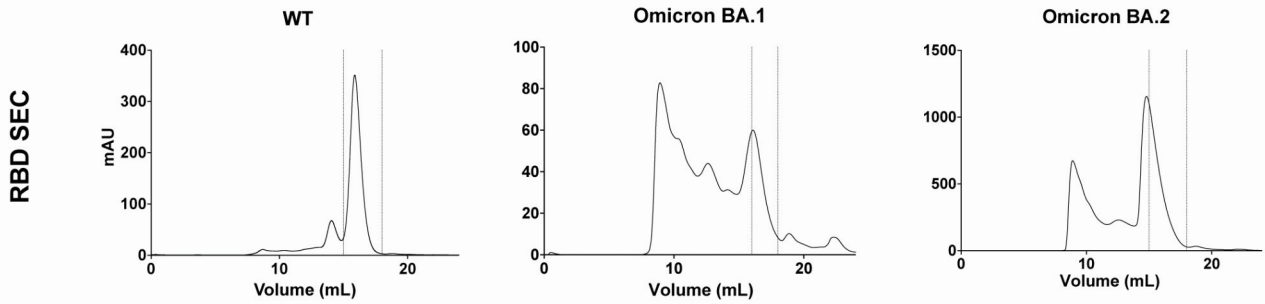**C**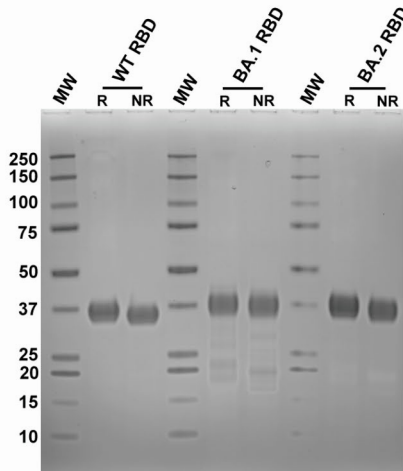**D**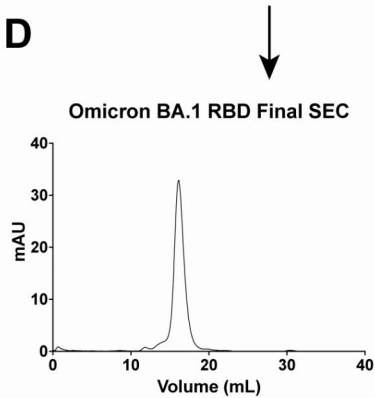**E**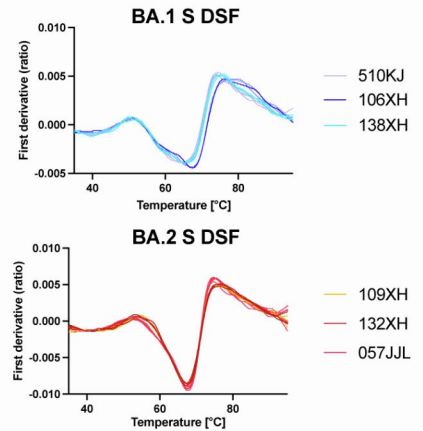

|                            | Lot #  | Ti#1 Mean<br>± St Dev | Ti#2 Mean<br>± St Dev | Ti#3 Mean<br>± St Dev |
|----------------------------|--------|-----------------------|-----------------------|-----------------------|
| <b>S-GSAS-Omicron-BA.1</b> | 510KJ  | 50.7 ± 0.1            | 64.9 ± 0.9            | 74.1 ± 0.3            |
|                            | 106XH  | 50.8 ± 0.2            | 67.4 ± 0.2            | 77.0 ± 0.9            |
|                            | 138XH  | 50.9 ± 0.9            | 65.4 ± 0.5            | 75.2 ± 0.6            |
| <b>S-GSAS-Omicron-BA.2</b> | 109XH  | 54.5 ± 0.4            | 67.5 ± 0.1            | 76.0 ± 0.8            |
|                            | 132XH  | 53.6 ± 0.6            | 67.4 ± 0.3            | 76.3 ± 0.5            |
|                            | 057JLL | 52.5 ± 1.0            | 67.6 ± 0.2            | 74.9 ± 0.3            |

**Figure S1. Quality control of SARS-CoV-2 S proteins and RBD proteins, Related to Figures 1 and 2.** (A) S-GSAS-Omicron-BA.2: (left) Size Exclusion Chromatography (SEC) with dashed lines indicating peak fractions pooled for final sample. (middle-left) SDS-PAGE: lane 1 molecular weight marker, lane 2 Reduced (R), and Non-reduced (NR) of 2  $\mu$ g Spike protein. (middle-right) Representative micrograph with 50 nm scale bar, and (right) 2D class averages with 10 nm scale bar. (B) From left to right SEC curves of WT, Omicron-BA.1, and Omicron-BA.2 RBDs, with dashed lines showing pooled fractions. (C) RBD protein SDS-PAGE with molecular weight marker, WT R and NR, Omicron-BA.1 R and NR, and Omicron-BA.2 R and NR. (D) Second and final SEC of Omicron-BA.1 RBD taken from pooled fractions indicated in B. (E) DSF plots of S-GSAS-Omicron BA.1 and BA.2 separated by lots. All lots were ran with three technical replicates, except 057JJL which had 6. Bottom table shows inflection temperatures  $\pm$  standard deviation. \*Fig 2A also includes data from lots 106XH and 109XH.

O<sup>1</sup><sub>BA.2</sub> (PDB 7UB0; EMD-26433)

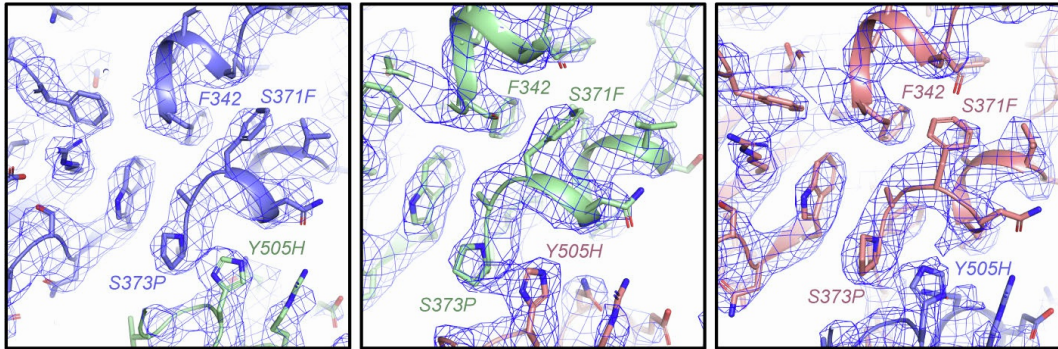

O<sup>2</sup><sub>BA.2</sub> (PDB 7UB5; EMD-26435)

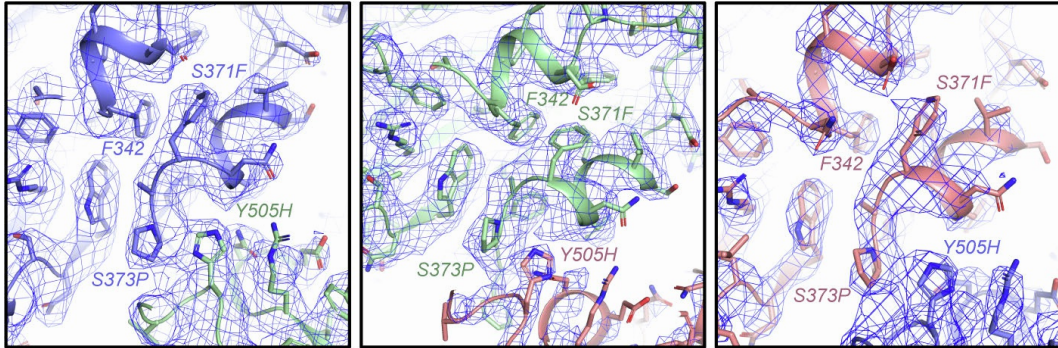

O<sup>3</sup><sub>BA.2</sub> (PDB 7UB6; EMD-26436)

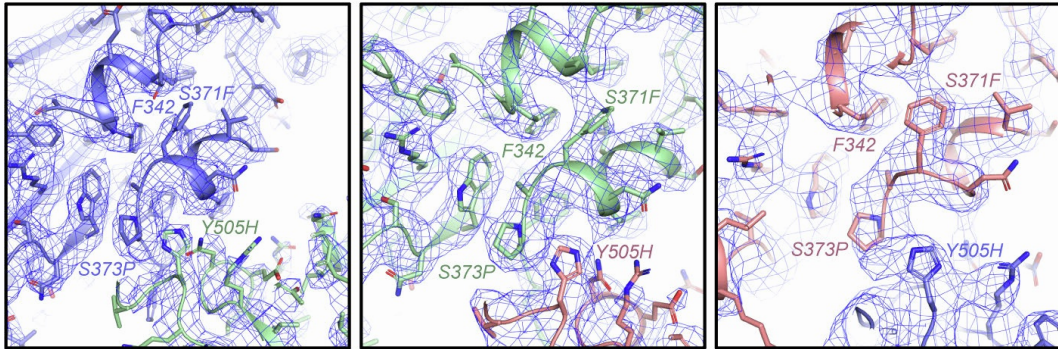

**Figure S2. View of RBD interfacial region bearing S371F and S373P substitutions, Related to Figures 1 and 3.** Cryo-EM reconstructions are shown as blue mesh with underlying fitted model in cartoon and side chains in sticks. Each panel shows the packing of the RBD region bearing the S371F and S373P substitutions with the RBD helix bearing residue F342, as well as inter-protomer packing with the adjacent RBD Y505H substitution stacking against P373. Details are shown for each protomer in O<sup>1</sup><sub>BA.2</sub> (top row), O<sup>2</sup><sub>BA.2</sub> (middle row) and O<sup>3</sup><sub>BA.2</sub> (bottom row).

O<sup>1</sup><sub>BA.2</sub> (PDB 7UB0; EMD-26433)

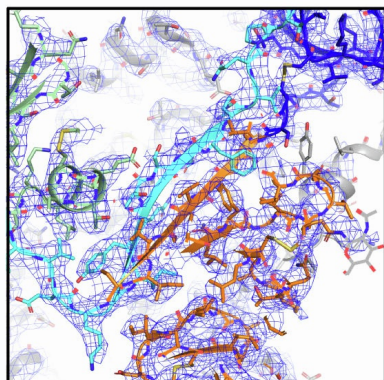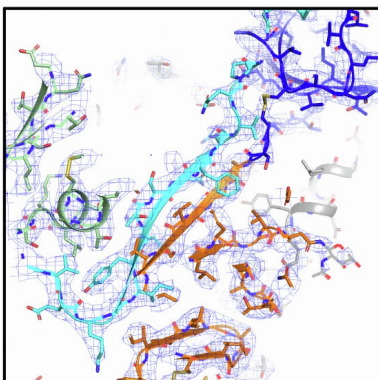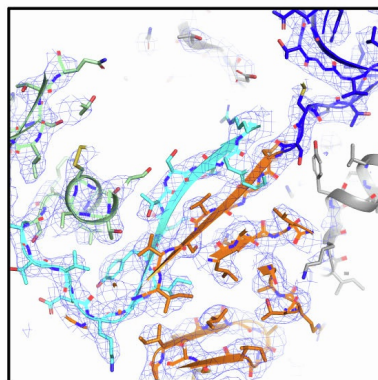

O<sup>2</sup><sub>BA.2</sub> (PDB 7UB5; EMD-26435)

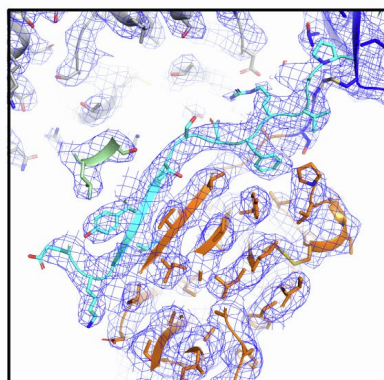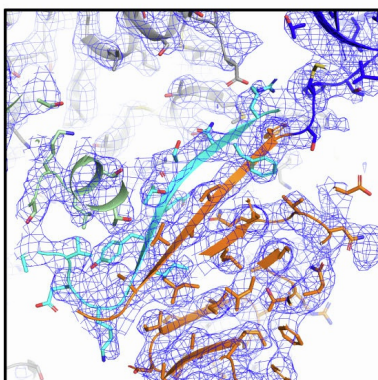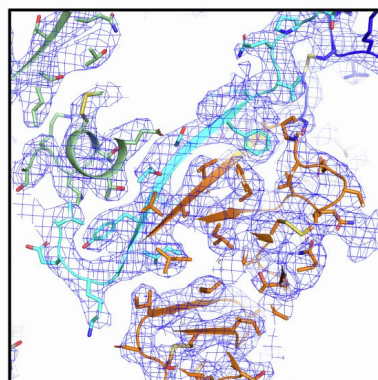

O<sup>3</sup><sub>BA.2</sub> (PDB 7UB6; EMD-26436)

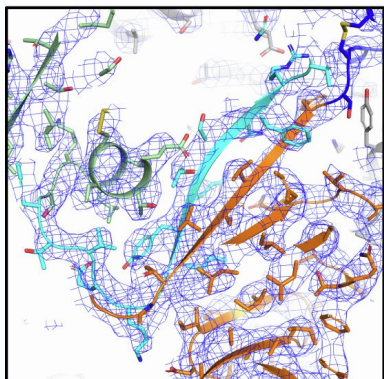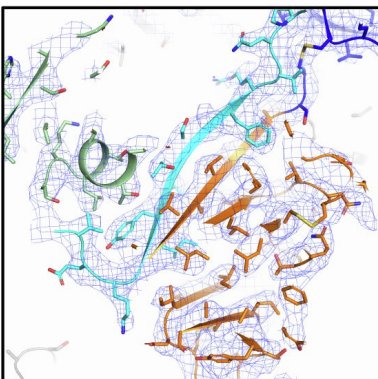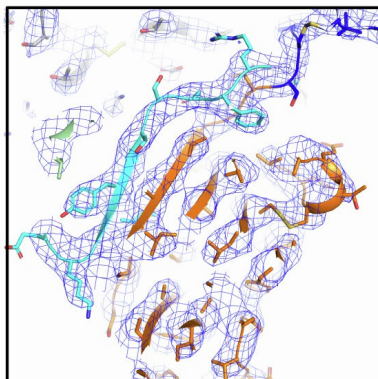

**Figure S3. View of NTD-to-RBD (N2R) linker in 3-RBD-down Omicron BA.2 S, Related to Figure 4.** Cryo-EM reconstructions are shown as blue mesh with underlying fitted model in cartoon and side chains in sticks. Each panel shows the N2R linker (cyan) of a protomer stacked against its SD2 subdomain (orange). The NTD is colored green and SD1 subdomain blue. Details are shown for each protomer in O<sup>1</sup><sub>BA.2</sub> (top row), O<sup>2</sup><sub>BA.2</sub> (middle row) and O<sup>3</sup><sub>BA.2</sub> (bottom row).

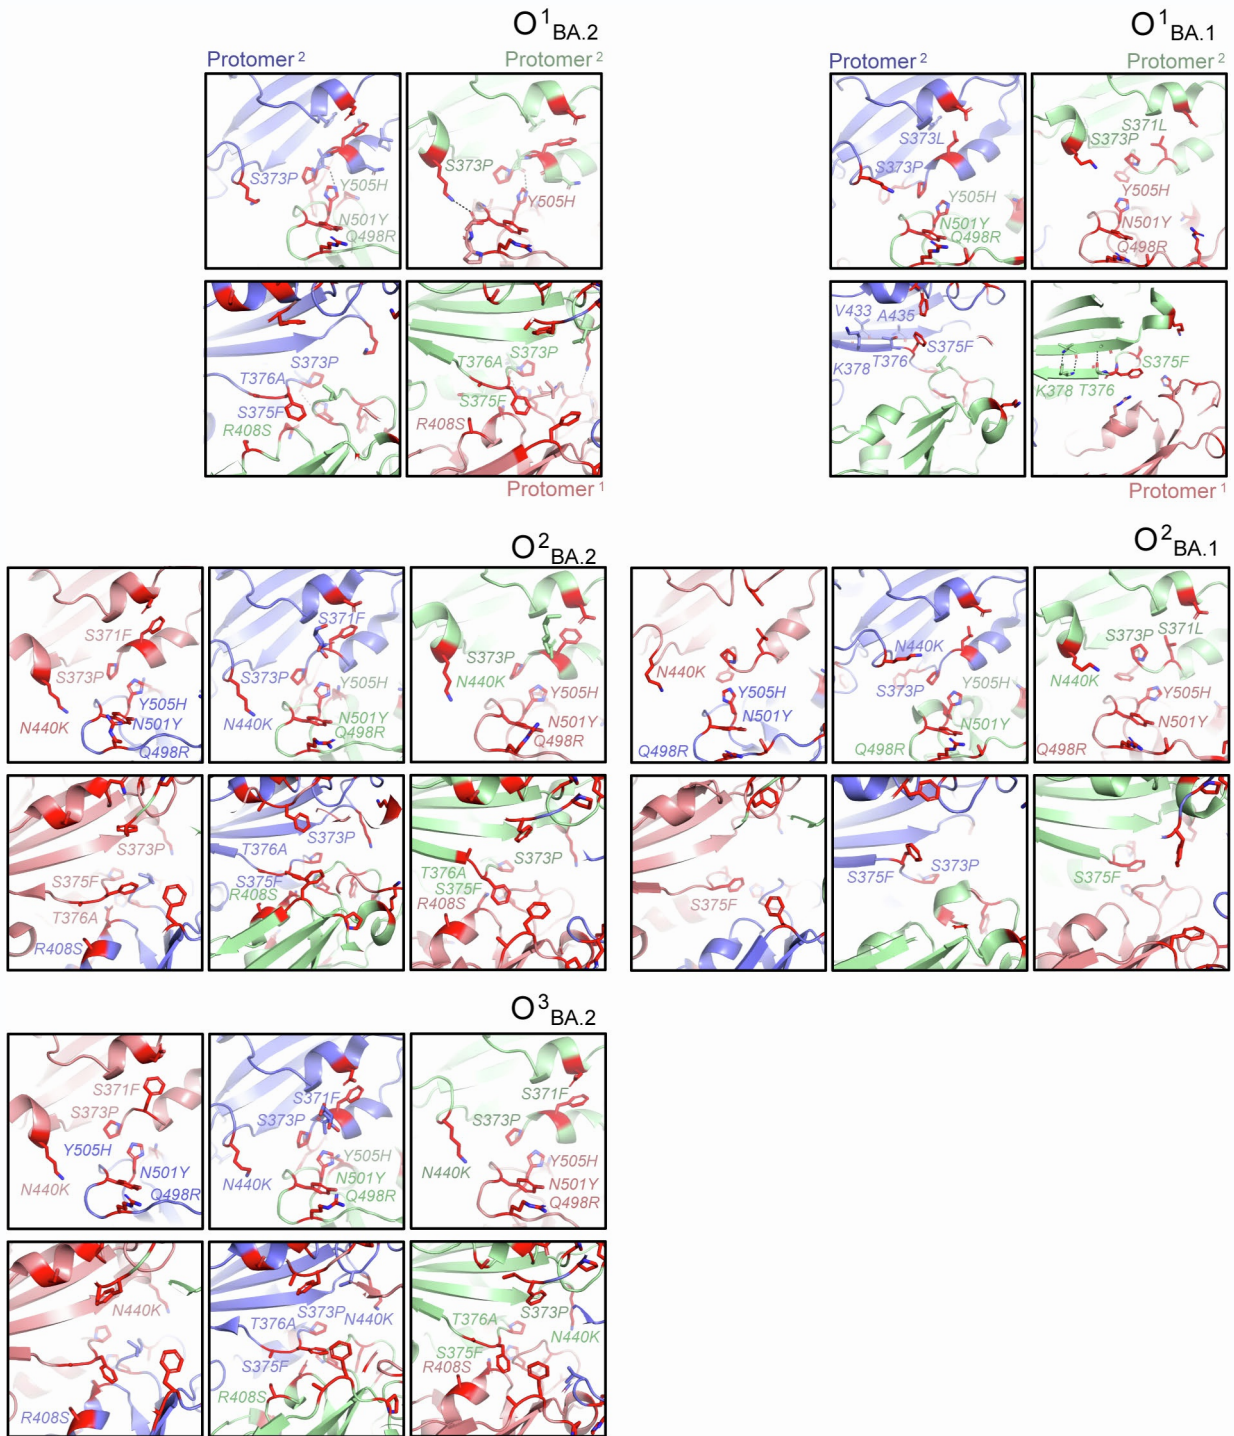

**Figure S4. Comparison of the RBD-RBD interface in the Omicron BA.1 and BA.2 S 3-RBD-down structures, Related to Figure 3.** Interprotomer interactions between adjacent RBDs are shown for (left) the BA.2 S protein structures (O<sup>1</sup><sub>BA.2</sub>: PDB 7UB0; O<sup>2</sup><sub>BA.2</sub>: PDB 7UB5; O<sup>3</sup><sub>BA.2</sub>: PDB 7UB6), and (right) the BA.1 S protein structures (O<sup>1</sup><sub>BA.1</sub>: PDB 7TF8; O<sup>2</sup><sub>BA.1</sub>: PDB 7TTL1)

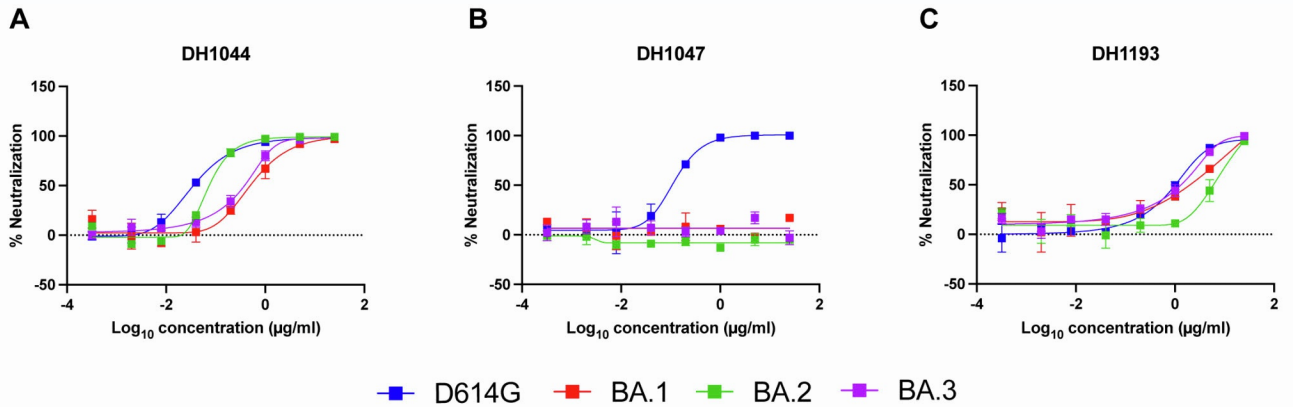

**D**

|        | D614G |      | Omicron -BA.1 |      | Omicron -BA.2 |      | Omicron -BA.3 |      |
|--------|-------|------|---------------|------|---------------|------|---------------|------|
|        | ID50  | ID80 | ID50          | ID80 | ID50          | ID80 | ID50          | ID80 |
| DH1044 | 0.04  | 0.17 | 0.52          | 2.3  | 0.09          | 0.19 | 0.35          | 0.99 |
| DH1047 | 0.1   | 0.34 | >25           | >25  | >25           | >25  | >25           | >25  |
| DH1193 | 1     | 3.7  | 2             | 11   | 6.1           | 16   | 1.3           | 4.4  |

**Figure S5. Pseudovirus neutralization by RBD-directed antibodies. Related to Figure 5. A. DH1044, B. DH1047, and C. DH1193. D. ID50 and ID80 values in  $\mu\text{g/ml}$ .** Neutralization data are presented as the mean of 2 technical replicates within the same assay and the error bars indicate the percent difference between the duplicate wells at each dilution. The neutralization data were log transformed and then fitted with an asymmetric five-parameter curve within Graphpad Prism. The ID50 and ID80 values represent the antibody concentration necessary to achieve 50% and 80% neutralization of each virus tested.

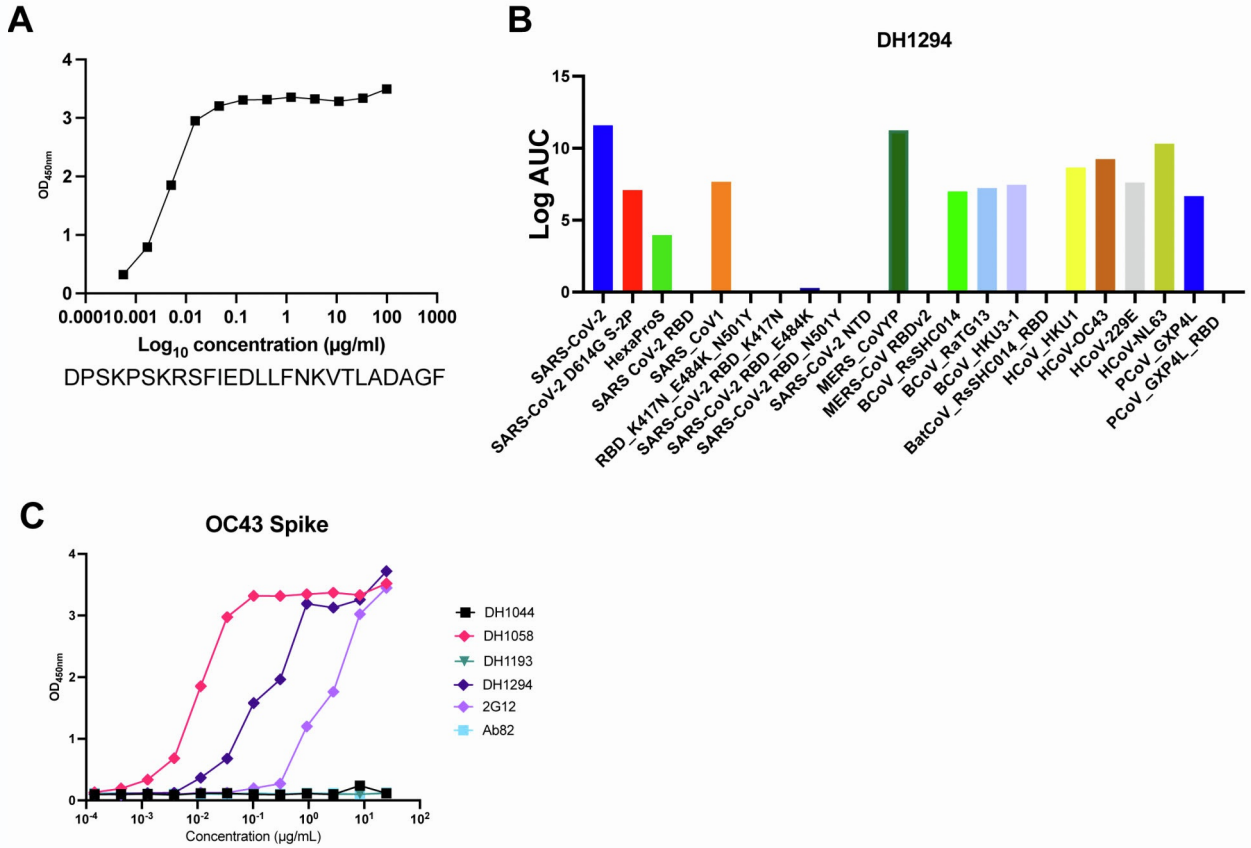

**Figure S6. Epitope mapping of fusion peptide directed antibody DH1294, Related to Figure 7. A.** Binding of antibody DH1294 to the fusion peptide (sequence indicated below). **B.** ELISA binding of DH1294 to diverse CoV spikes. **C.** ELISA binding of antibodies to the CoV OC43 spike.



**Table S1: Cryo-EM data collection and refinements statistics**  
**S-GSAS-Omicron-BA.2, related to Figures 1, 3, 4, 6, 7, S2-S4, Data S2-S3.**

|                                        | 3-down          |         |         | 1-up   |         | 1.5-up |
|----------------------------------------|-----------------|---------|---------|--------|---------|--------|
| <b>PDB ID</b>                          | 7UB0            | 7UB5    | 7UB6    | n/a    | n/a     | n/a    |
| <b>EMDB ID</b>                         | 26433           | 26435   | 26436   | 26644  | 26647   | 26643  |
| <b>Data Collection and processing</b>  |                 |         |         |        |         |        |
| Microscope                             | FEI Titan Krios |         |         |        |         |        |
| Detector                               | Gatan K3        |         |         |        |         |        |
| Magnification                          | 81000           |         |         |        |         |        |
| Voltage (kV)                           | 300             |         |         |        |         |        |
| Electron exposure (e-/Å <sup>2</sup> ) | 54.7            |         |         |        |         |        |
| Defocus Range (µm)                     | 2.6 to 0.8      |         |         |        |         |        |
| Pixel size (Å)                         | 1.08            |         |         |        |         |        |
| Reconstruction software                | cryoSPARC       |         |         |        |         |        |
| Symmetry imposed                       | C1              | C1      | C1      | C1     | C1      | C1     |
| Initial particle images (no.)          |                 |         |         |        |         |        |
| Final particle images (no.)            | 411,890         | 276,707 | 198,211 | 70,271 | 114,624 | 54,450 |
| Map resolution (Å)                     | 3.31            | 3.35    | 3.52    | 3.93   | 3.74    | 3.98   |
| FSC threshold                          | 0.143           | 0.143   | 0.143   | 0.143  | 0.143   | 0.143  |
| <b>Refinement</b>                      |                 |         |         |        |         |        |
| Initial model used                     | 7KDK            | 7KDK    | 7KDK    |        |         |        |
| <b>Model composition</b>               |                 |         |         |        |         |        |
| Nonhydrogen atoms                      | 25,039          | 24,963  | 24,762  |        |         |        |
| Protein residues                       | 3,112           | 3,107   | 3,105   |        |         |        |
| <b>R.M.S. deviations</b>               |                 |         |         |        |         |        |
| Bond lengths (Å)                       | 0.004           | 0.004   | 0.004   |        |         |        |
| Bond angles (°)                        | 0.651           | 0.663   | 0.669   |        |         |        |
| <b>Validation</b>                      |                 |         |         |        |         |        |
| MolProbity score                       | 1.22            | 1.29    | 1.24    |        |         |        |
| Clashscore                             | 3.25            | 2.74    | 2.96    |        |         |        |
| Poor rotamers (%)                      | 0               | 0       | 0       |        |         |        |
| EM ringer score                        | 3.44            | 3.13    | 2.97    |        |         |        |
| <b>Ramachandran plot</b>               |                 |         |         |        |         |        |
| Favored regions (%)                    | 97.49           | 96.47   | 97.19   |        |         |        |
| Allowed (%)                            | 2.51            | 3.53    | 2.81    |        |         |        |
| Disallowed regions (%)                 | 0               | 0       | 0       |        |         |        |

Clade

- 20H (Beta, V2)
- 20I (Alpha, V1)
- 20J (Gamma, V3)
- 21A (Delta)
- 21I (Delta)
- 21J (Delta)
- 21K (Omicron)
- 21L (Omicron)

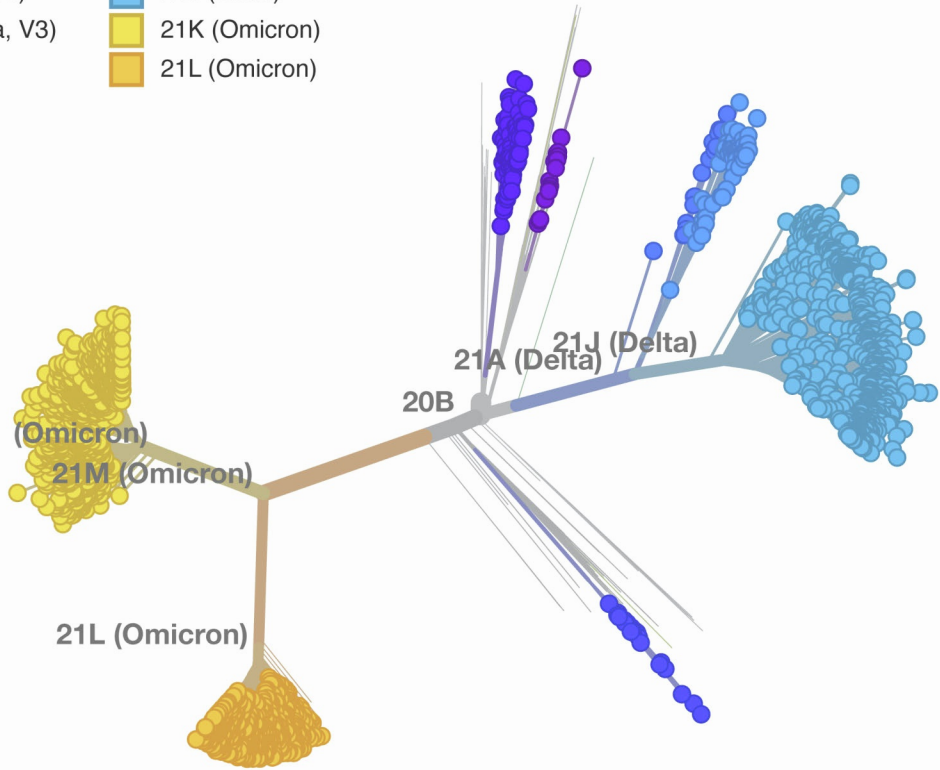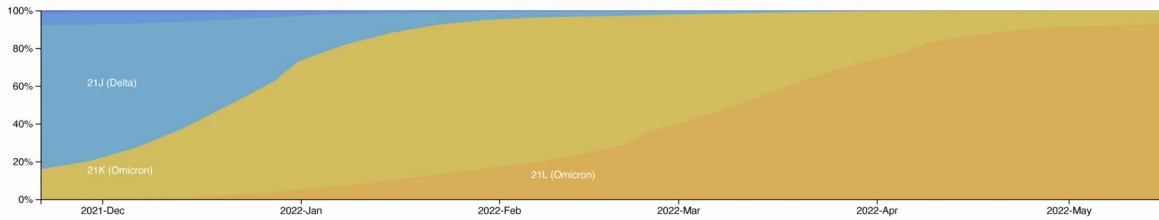

**Data S1. Emergence and spread of the SARS-CoV-2 Omicron variant lineages, Related to Figure 1. Top.** Phylogenetic tree of SARS-CoV-2 variants of concern. **Bottom.** Global frequencies of SARS-CoV-2 variants plotted against time from April 2021 to May 2022.

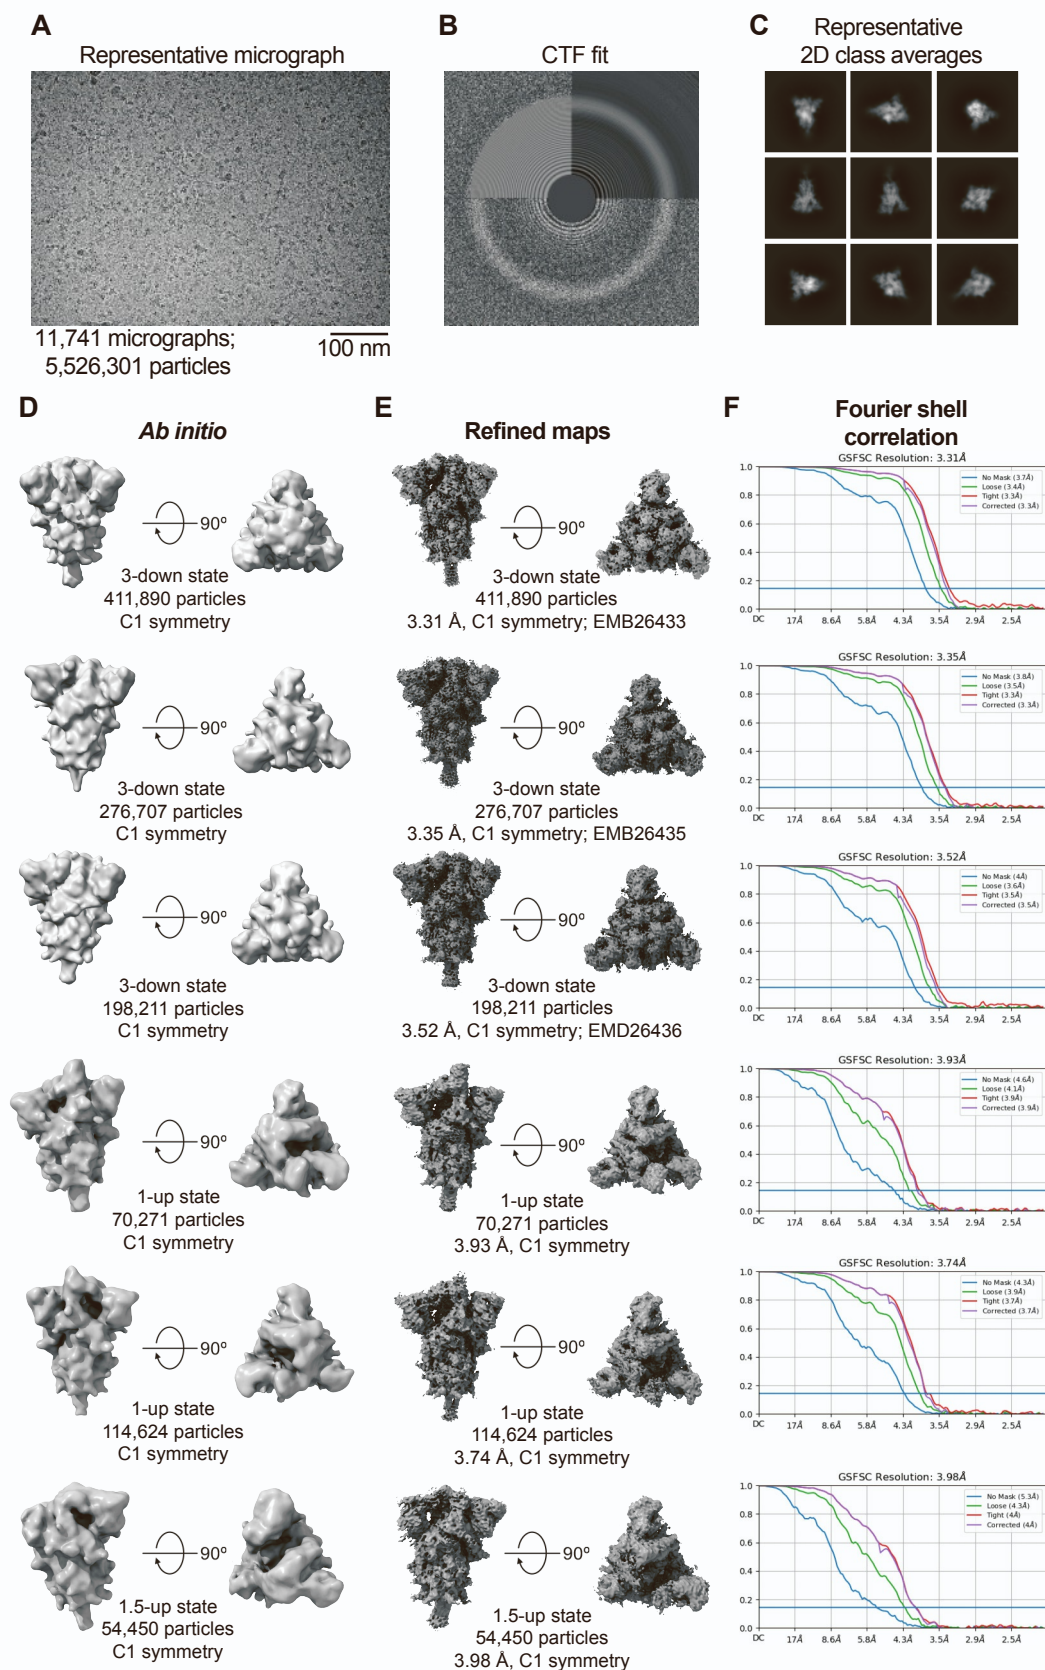

**Data S2. Cryo-EM data processing for the S-GSAS-Omicron SARS-CoV-2 S ectodomain, Related to Figure 1, Table S1.** (A) Representative micrograph. (B) CTF Fit. (C) Representative 2D class averages from cryo-EM dataset. Box size = 345.6 Å. (D) Ab initio reconstructions for the cryo-EM 3-RBD-down, 1-RBD-up, and 1.5-RBD-up states. (E) Refined maps for the cryo-EM corresponding states. (F) Fourier shell correlation curves for the cryo-EM corresponding states.

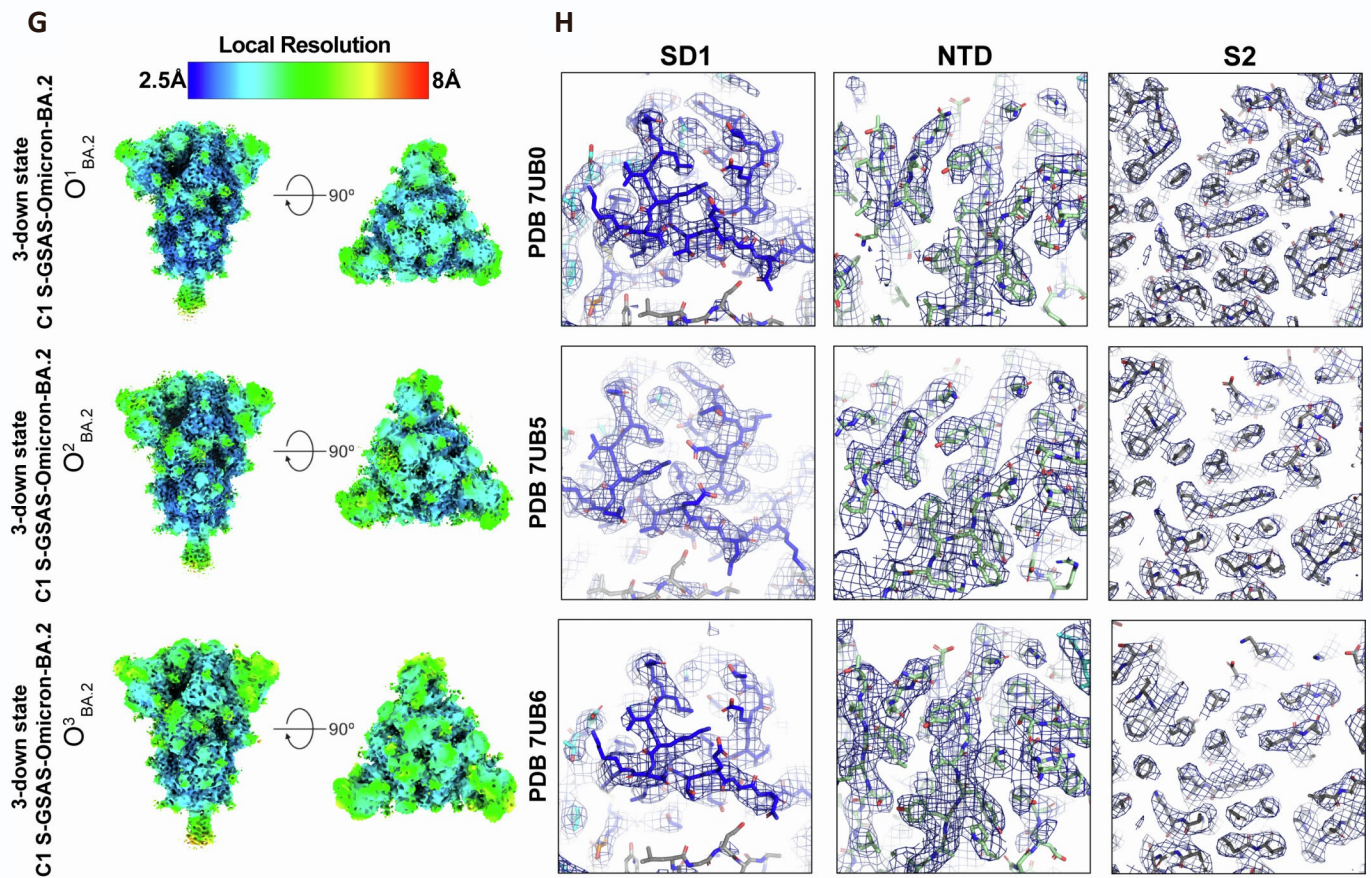

**Data S2 continued. Cryo-EM data processing for the S-GSAS-Omicron SARS-CoV-2 S ectodomain, Related to Figure 1, Table S1. (G)** Refined maps colored by local resolution ranging from 2.5 Å to 8 Å. **(H)** Zoomed in views of SD1, NTD, and S2.

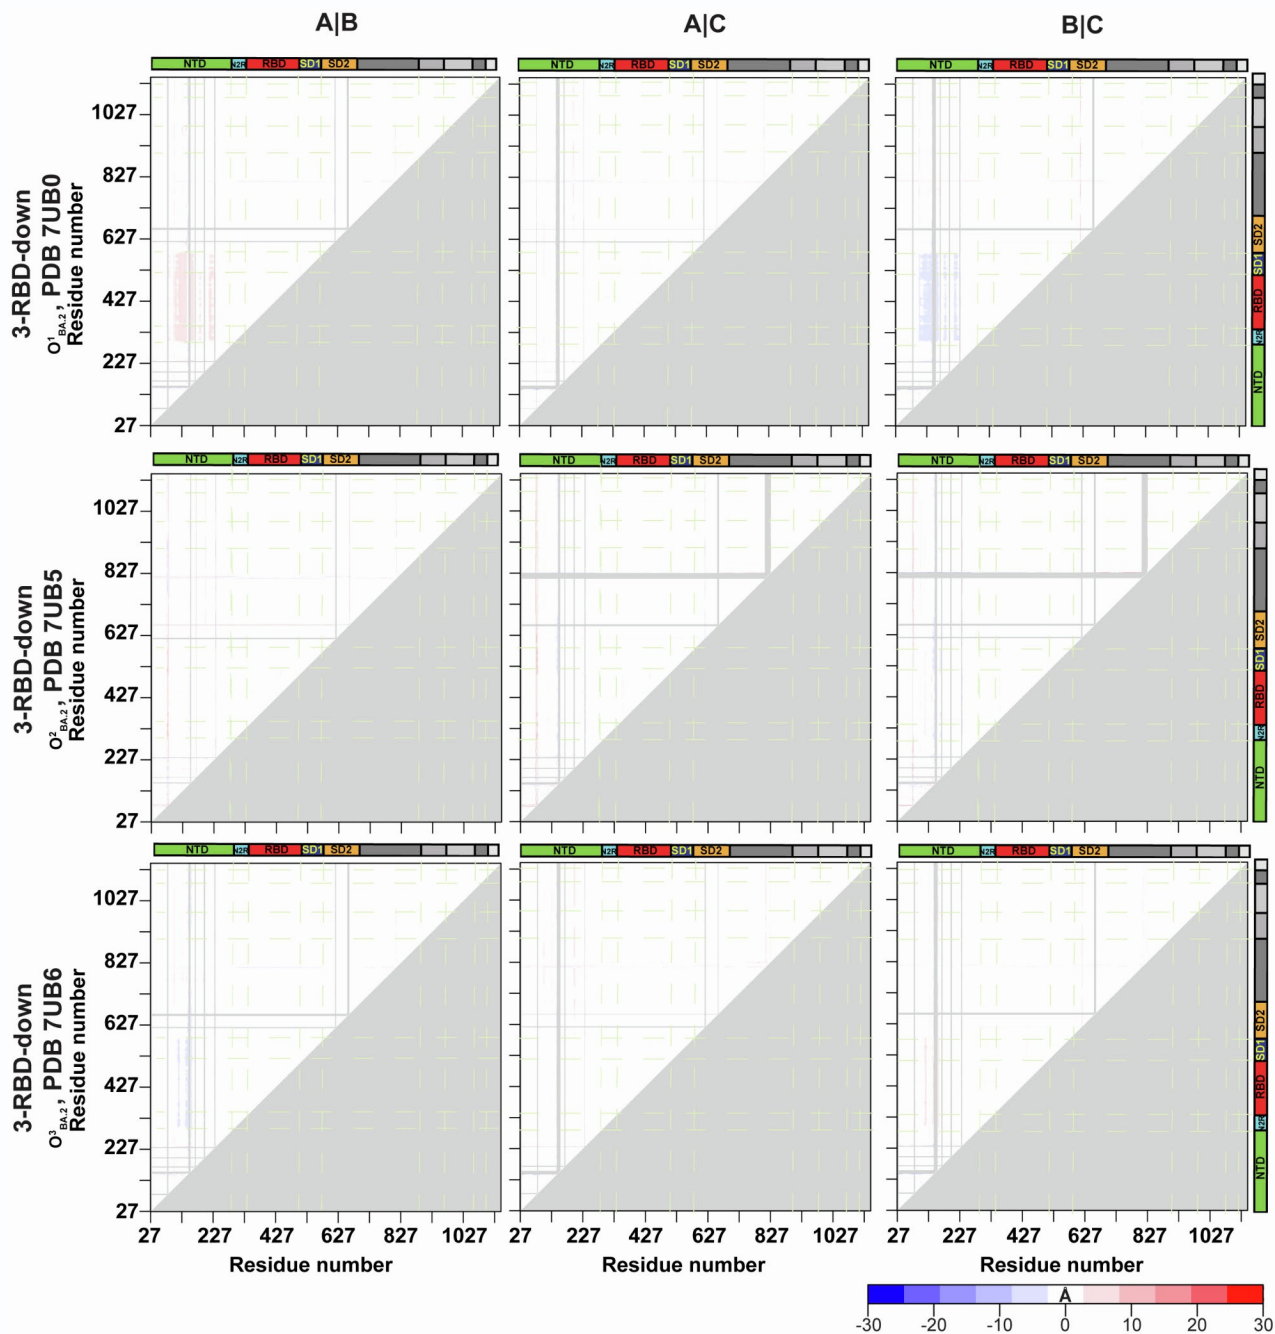

**Data S3. Difference distance matrices (DDMs) analyses of S-GSAS-Omicron-BA.2 S ectodomain 3-RBD-down structures. Related to Figures 1 and 3, Table S1.** Intrachain variability. Difference distance matrices (DDMs) provide superposition-free comparisons between a pair of structures by calculating the differences between the distances of each pair of Ca atoms in a structure and the corresponding pair of Ca atoms in the second structure. DDM of the 3-RBD down structures comparing each chain of a structure to the other chains of the same structure. The coloring scale used for the DDM analysis is represented on the bottom right corner.

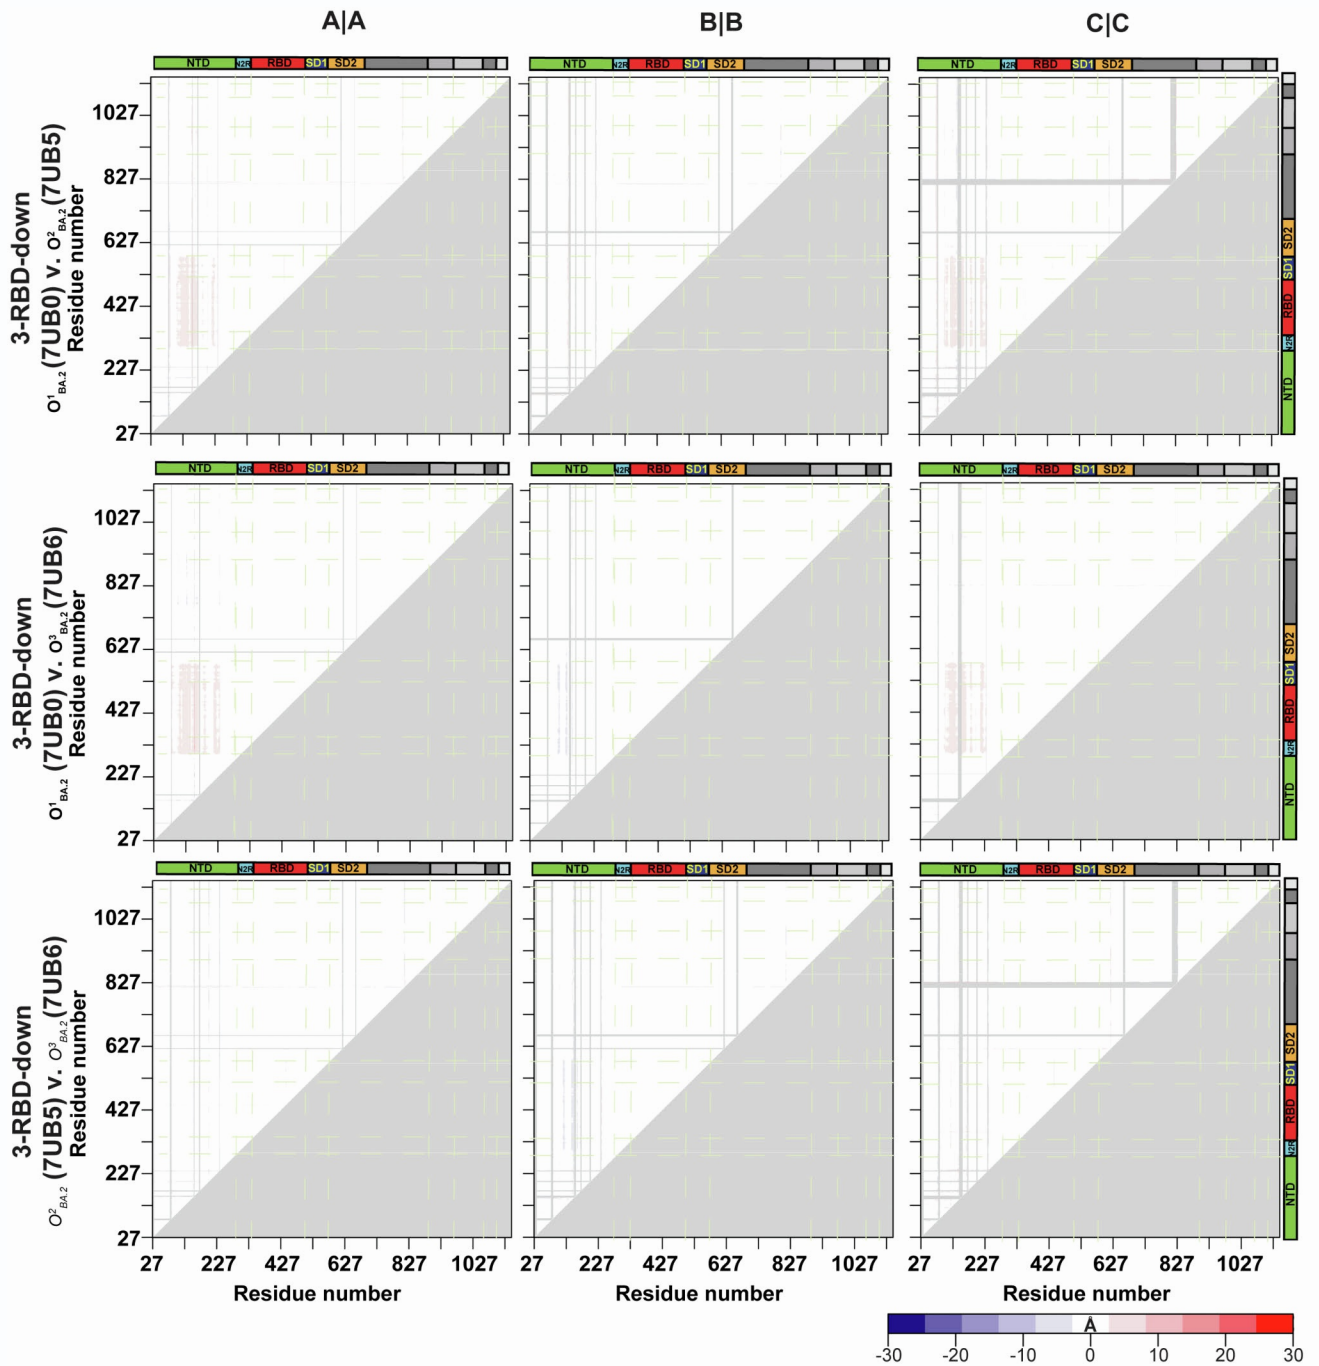

**Data S3 continued. Difference distance matrices (DDMs) analyses of S-GSAS-Omicron-BA.2 S ectodomain 3-RBD-down structures. Related to Figures 1 and 3, Table S1.** Interchain variability. DDM of the 3-RBD down structures comparing each chain of a structure to the same chain of another structure. The coloring scale used for the DDM analysis is represented on the bottom right corner.

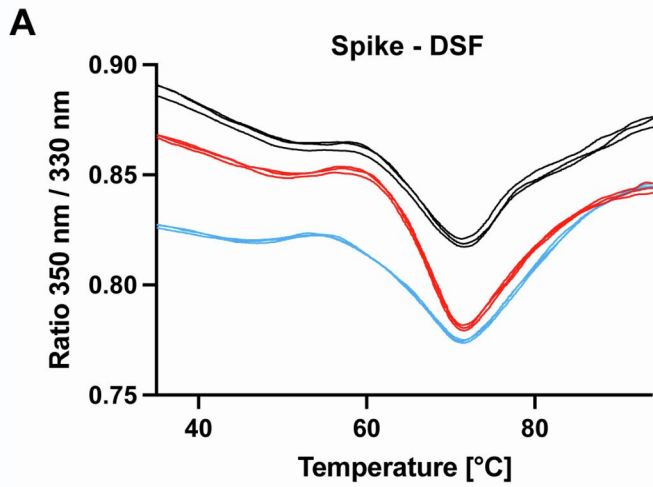

— D614G  
— BA.1  
— BA.2

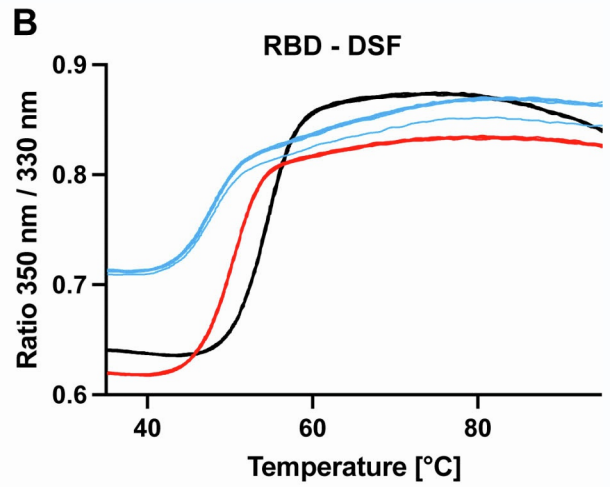

**Data S4. Thermostability of SARS-CoV-2 S proteins and RBD proteins, Related to Figure 2.** A. SARS-CoV-2 S protein DSF profiles showing changes in protein intrinsic fluorescence (expressed as a ratio between fluorescence at 350 and 330 nm). For each S protein construct (color coded as shown), three overlaid curves (technical replicates) are shown.

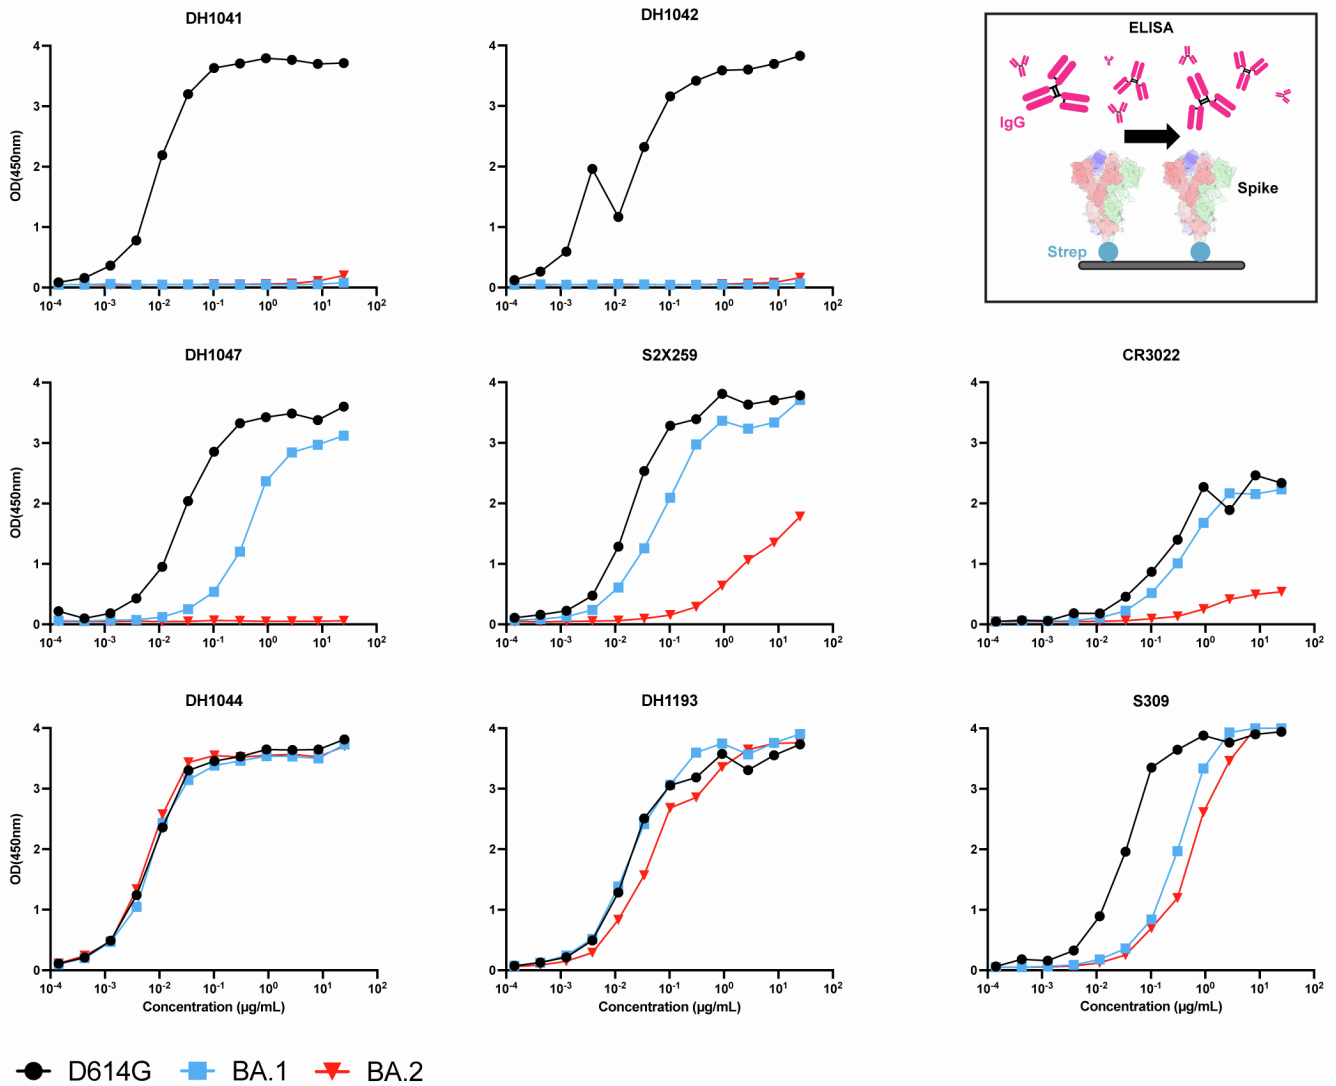

**Data S5. Binding of RBD-directed antibodies to S protein and RBD variants, Related to Figures 5 and 6.** ELISA binding of antibodies, top row, DH1041 and DH1042 (RBM-targeting), second row, DH1047, S2X259, and CR3022 (inner face RBD-targeting), and bottom row, DH1044, DH1193, and S309 (outer RBD face-targeting) to the D614G (black), BA.1 (blue) and BA.2 (red) S protein ectodomains. Schematic shows the assay format. Data are representative of at least two independent experiments.



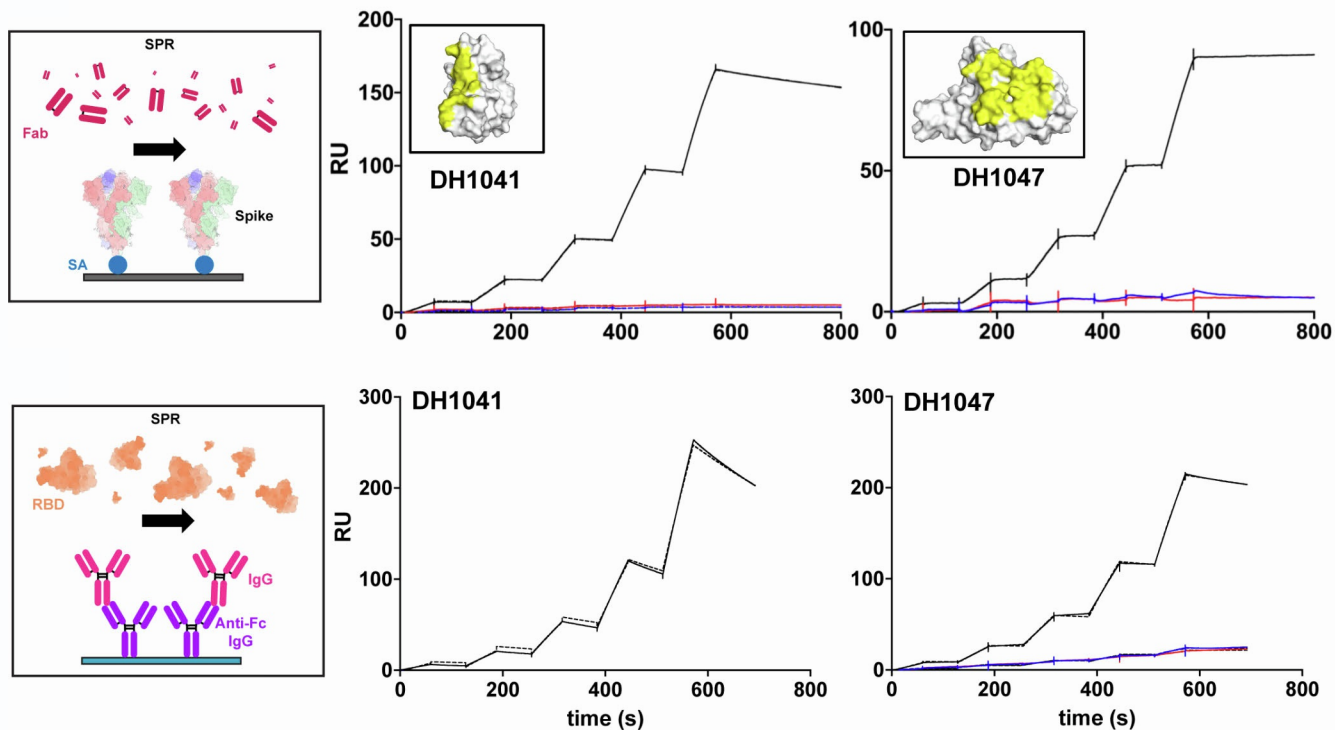

**Data S5 continued. Binding of RBD-directed antibodies to S protein and RBD variants, Related to Figures 5 and 6.** Binding of RBD-directed Fabs to S protein and RBD variants measured by SPR. **Top.** Schematic shows the assay format. Spike is captured on a Series S Streptavidin (SA) chip coated at 200 nM. Fabs were then injected at concentrations ranging from 0.5 nM to 8 nM, with a contact time of 60 seconds and a dissociation time of 120 seconds (50  $\mu$ L/min) **Bottom.** Schematic shows the assay format. Antibodies were captured on a CM5 chip labeled with anti-Fc IgG antibodies. Binding of DH1044 and DH1193 Fabs to D614G (black), BA.1 (blue) and BA.2 (red) S protein ectodomains measured by SPR. The solid lines are the binding sensograms; the dotted lines show fits of the data to a 1:1 Langmuir binding model. Data shown are representative of at least two independent experiments.

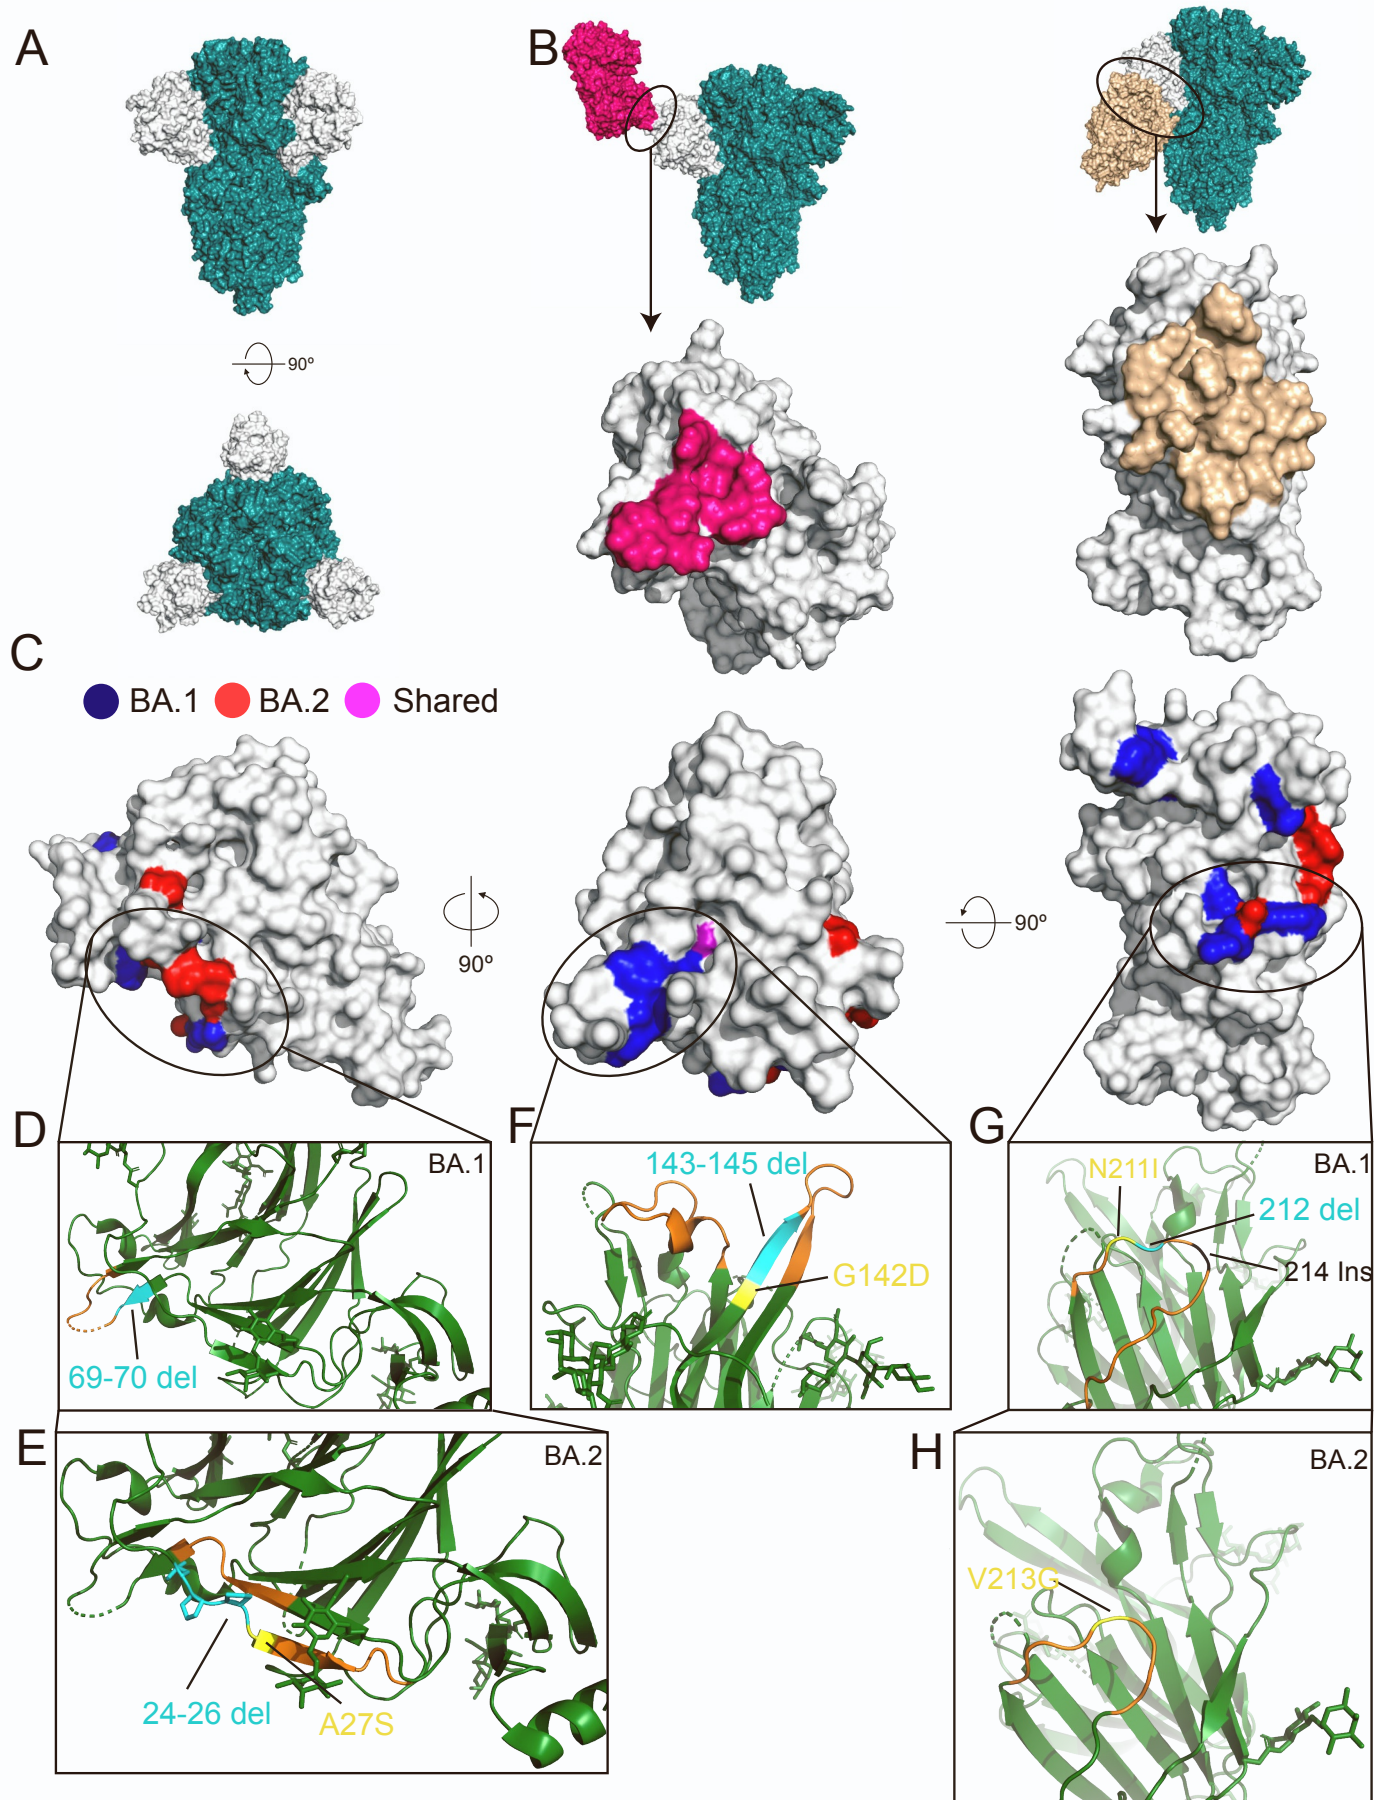

**Data S6. Comparison of N-terminal domain (NTD) mutations between BA.1 and BA.2 lineages. Related to Figure 5.**

**A.** Surface view of the spike trimer, teal, with each NTD shown in white, side view and top view. **B.** Surface views of the spike, with Fab regions of NTD-targeted antibodies bound: DH1050.1, pink, and DH1052, gold, are both shown and the NTD is shown in isolation, with residues contacted by the antibodies highlighted with the same color. Only one NTD is colored white and only one antibody Fab are shown in these views. **C.** Three views of the wild-type NTD with residues mutated in the Omicron variants highlighted as follows: blue: BA.1, red: BA.2, magenta: shared in BA.1 and BA.2. **D-H.** Cartoon and Stick views showing mutated residues from areas highlighted in C. Color scheme for d-h is as follows: yellow: mutated residue, cyan: deleted residues, black: insertion site, orange: nearby residues/loop residues, other NTD residues: green. Models used: A: 7LAB, B: 7LCN (DH1050.1) and 7LAB (DH1052): C-H: 7LY3

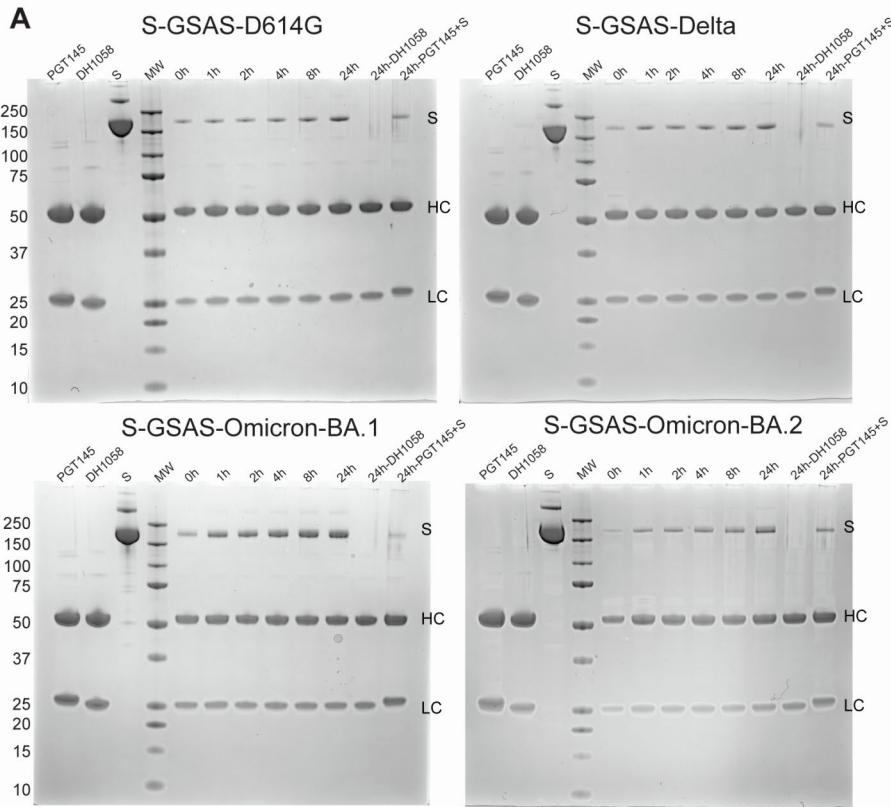

- S-GSAS-D614G
- S-GSAS-Delta
- ▲ S-GSAS-Omicron-BA.1
- ▼ S-GSAS-Omicron-BA.2

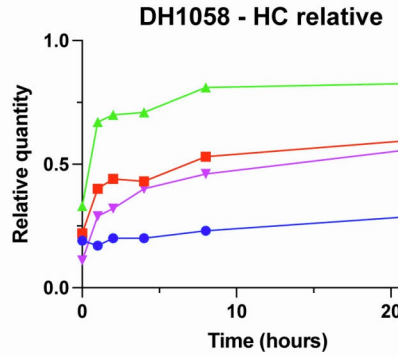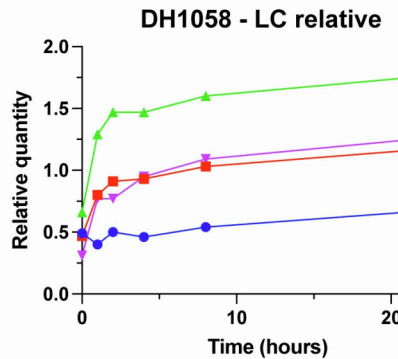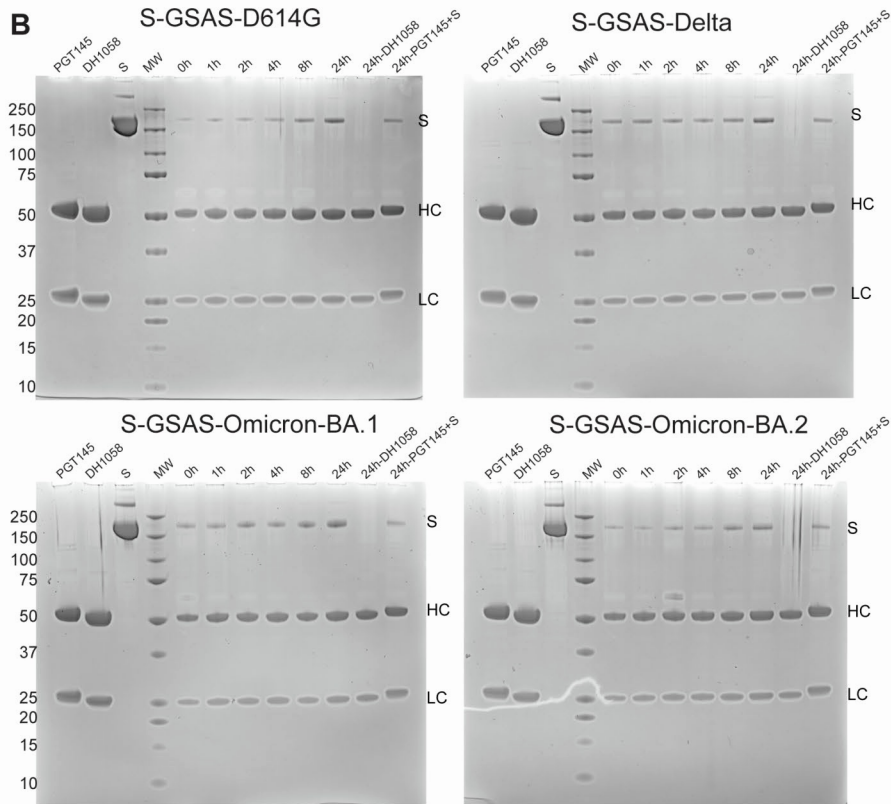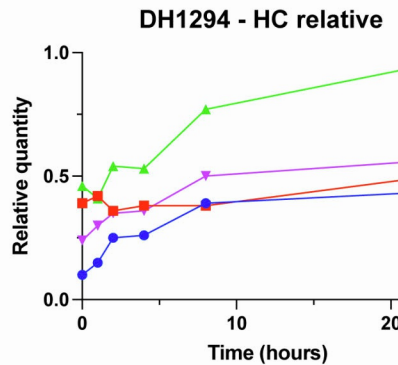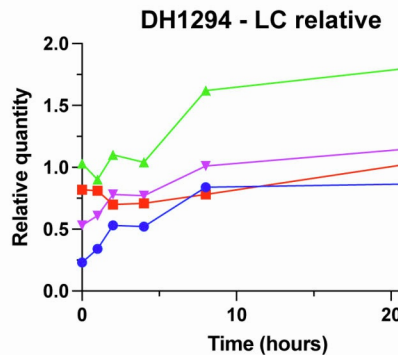

**Data S7. Time dependent exposure of fusion peptide (FP) to FP-directed antibodies, Related to Figure 7. A.** Left. Reducing SDS-PAGE of immunoprecipitation of S-GSAS-D614G, S-GSAS-Delta, S-GSAS-Omicron-BA.1 and S-GSAS-Omicron-BA.2 using FP-directed antibody DH1058 bound to a Protein A coupled resin. Right. Intensity of the S protein band at each time point was normalized with the intensity of the heavy chain (HC, top) or light chain (LC, bottom) band.

**B.** Same as **A.** but for antibody DH1294. Data shown are representative of at least two independent experiments.
